# Supplementary material for: NMDAR in bladder smooth muscle is not a pharmacotherapy target for overactive bladder in mice
Source: PeerJ. 2021 Jul 7;9:e11684. doi: 10.7717/peerj.11684 (PMC8272467; doi:10.7717/peerj.11684)
Supplement: Supplemental Information 1 [file peerj-09-11684-s001.xlsx]

## Sheet: Figure 1B body weight
	WT							SMNRKO
	1	2	3	4	5	6	7	1	2	3	4	5	6	7	8	9
Female	23.3	21.7	22.8	21.5	22	20.9	21.7	22.1	22.3	21.5	18.1	24.3	22.2	21.1	22.2	22.4
Male	26.3	25.7	22.8	27.1	25.1	26	27.1	28.2	22.7	27.7	22.3	38.4	24.6

## Sheet: Figure 1C bladder weight
	WT							SMNRKO
	1	2	3	4	5	6	7	1	2	3	4	5	6	7	8	9
Female	22.6	20.1	28.9	20.2	22	23.9	19.4	18.1	22.3	22.5	17.2	23.1	21.4	22	22.8	21.1
Male	25.7	30.5	24.5	26.4	27.4	25.4	24.4	27	17.6	25	18.6	33.8	30

## Sheet: Figure 1D bladder-to-body ratio
	WT							SMNRKO
	1	2	3	4	5	6	7	1	2	3	4	5	6	7	8	9
Female	0.969957	0.926267	1.26754	0.939535	1	1.14354	0.894009	0.819005	1	1.04651	0.950276	0.950617	0.963964	1.04265	1.02703	0.941964
Male	0.977186	1.18677	1.07456	0.97417	1.09163	0.976923	0.900369	0.957447	0.77533	0.902527	0.834081	0.880208	1.21951

## Sheet: Figure 2E NO of PVS
	WT																																SMNRKO
	1	2	3	4	5	6	7	8	9	10	11	12	13	14	15	16	17	18	19	20	21	22	23	24	25	26	27	28	29	30	31	32	1	2	3	4	5	6	7	8	9	10	11	12	13	14	15	16	17
Female	2	7	3	3	2	3	2	2	3	4	6	4	2	3	3	4	3	3	3	4	8	5	3	5	8	3	3	2	3	2	2	5	2	6	2	4	3	2	2	6	3	6	2	4	6	4	2	4	3
Male	3	4	4	1	5	1	2	2	2	7	5	1	5	3	2	3	5	3	5	1	4	4	3	3	2	4							1	3	3	3	2	3	3	5	3	3	1	2	6	3	1	3	8
[truncated: 27 more columns]

## Sheet: Figure 2F area of PVS
	Comtrol
	1	2	3	4	5	6	7	8	9	10	11	12	13	14	15	16	17	18	19	20	21	22	23	24	25	26	27	28	29	30	31	32	33	34	35	36	37	38	39	40	41	42	43	44	45	46	47	48	49
Female	401.906	496.947	86.3919	112.044	129.422	182.214	235.02	281.316	409.113	164.529	282.161	352.651	285.826	380.838	529.881	423.428	540.067	305.644	374.623	509.371	612.38	668.788	336.261	489.795	155.598	281.523	477.06	150.683	210.524	235.055	396.109	185.346	244.035	304.35	326.248	346.679	464.093	460.872	518.514	556.857	794.5	839.368	956.041	222.29	484.751	970.109	331.089	479.055	489.404
Male	1428.83	91.9567	593.098	312.335	961.281	430.531	640.007	476.718	212.617	398.247	320.3	601.514	329.932	623.523	113.254	199.977	326.014	422.23	1316.67	551.968	1203.77	1617.89	1174.49	1189.77	354.222	196.682	178.907	116.158	770.669	238.198	509.794	504.792	423.418	377.449	506.979	456.686	975.727	1025.46	757.441	345.887	284.246	119.779	347.851	394.69	344.422	1302.46	483.827	650.435	580.077
[truncated: 229 more columns]

## Sheet: Figure 2G Total area
																																	SMNRKO
	1	2	3	4	5	6	7	8	9	10	11	12	13	14	15	16	17	18	19	20	21	22	23	24	25	26	27	28	29	30	31	32	1	2	3	4	5	6	7	8	9	10	11	12	13	14	15	16	17
Female	1008.83	1553.87	817.618	1277.56	985.339	1275.61	1316.85	827.868	984.8	992.371	1978.46	2434.05	1962.49	1738.38	1299.55	1469.34	1476.57	1268.3	1014.91	898.102	2666.99	1739.98	2045.13	2393.68	2338.66	1821.48	895.104	1319.1	895.311	927.682	1291.32	1494.13	970.404	1143.26	778.159	1306.76	598.655	689.959	1303.07	2038.28	1265.98	1661.35	1894.95	1675.45	1643.65	2155.12	568.278	1115.04	1900.91
Male	2250.01	2464.16	1690.36	759.619	1781.2	430.368	1885.48	2823.7	2470.56	2548.93	2279.19	986.467	2829.66	1353.07	1943.91	1964.65	1590.93	1798.23	2213.61	1384.74	2963.96	2380.96	1072.33	2036.14	1149.9	1650.75							1843.21	773.386	1515.74	1239.21	3150.72	2355.13	883.981	1582.93	966.382	1776.59	1668.88	2316.61	2475.95	1558.19	1324.04	1344.78	2269.2
[truncated: 27 more columns]

## Sheet: Figure 2H Frequency female
	WT	SMNRKO
40-80	8.73	6.25
80-200	15.87	23.3
200-300	23.81	25.57
300-400	15.87	14.2
400-500	15.87	9.09
500-600	9.52	9.09
600-700	3.97	3.98
700-800	2.38	3.98
800-900	0.79	2.84
900-1000	2.38	1.7
>1000	0.79	0

## Sheet: Figure 2I Frequency male
	WT	SMNRKO
40-80	22.02	4
80-200	14.68	12
200-300	9.17	28
300-400	14.68	12
400-500	7.34	14.67
500-600	6.42	4
600-700	9.17	2.67
700-800	2.75	6.67
800-900	1.83	2.67
900-1000	1.83	1.33
1000-1100	0.92	4
1100-1200	1.83	0
1200-1300	2.75	2.67
1300-1400	1.83	2.67
>1400	2.75	2.67

## Sheet: Figure 2L voiding interval
WT	SMNRKO
2.82	2.79833
2.12	2.585
2.25	2.54667
2.83	2.63833
2.79	3.99333

## Sheet: Figure 2M Peak pressure
WT	SMNRKO
29.2743	29.3638
29.8388	29.1191
30.8065	30.6688
29.4356	30.5057
31.4517	30.9951

[truncated: 30 more sheets: Figure 2N Thtreshold pressure, Figure 2O Basal pressure, Figure 2P compliance, Figure 3E Force female, Figure 3F Force male, Figure 3G Force α,β-meATP, Figure 3H Force carbachol, Figure 3I Force Kcl, Figure 4B body weigth, Figure 4C bladder weight, Figure 4D bladder to body ratio, Figure 5E no of pvs, Figure 5F area of PVS, Figure 5G total area, Figure 5H Frequency , Figure 5M Voiding interval, Figure 5N Peak pressure, Figure 5O Basal pressure, Figure 5P threshold pressure, Figure 5Q compliance …]
